# Supplementary material
Source: PubMed Central journal article supplement (PMC4937837)
Supplement: jm5b00776_si_001.pdf [file jm5b00776_si_001.pdf]

## *Supporting Information*

### **High affinity dopamine D<sub>3</sub> receptor (D<sub>3</sub>R)-selective antagonists attenuate heroin self-administration in wildtype but not D<sub>3</sub>R knockout mice**

*Comfort A. Boateng,<sup>†,#</sup> Oluyomi M. Bakare,<sup>†,#</sup> Jia Zhan,<sup>†,%</sup> Ashwini K. Banala,<sup>†</sup> Caitlin Burzynski,<sup>†</sup> Elie Pommier,<sup>†</sup> Thomas M. Keck,<sup>†,+</sup> Prashant Donthamsetti,<sup>^</sup> Jonathan A. Javitch,<sup>^</sup> Rana Rais,<sup>‡</sup> Barbara S. Slusher,<sup>‡</sup> Zheng-Xiong Xi<sup>†</sup> and Amy Hauck Newman<sup>\*†</sup>*

<sup>†</sup>Molecular Targets and Medications Discovery Branch, National Institute on Drug Abuse  
– Intramural Research Program, National Institutes of Health, 333 Cassell Drive,  
Baltimore, Maryland 21224, United States

<sup>+</sup>Department of Chemistry & Biochemistry, College of Science and Mathematics;  
Department of Biomedical & Translational Sciences, School of Biomedical Science &  
Health Professions, Rowan University, 201 Mullica Hill Road, Glassboro, New Jersey  
08028, United States

<sup>‡</sup>Department of Neurology, Brain Science Institute, The Johns Hopkins University  
School of Medicine, 855 N. Wolfe Street, Baltimore, MD 21205, United States

<sup>^</sup>Departments of Psychiatry and Pharmacology, Columbia University College of  
Physicians and Surgeons, and Division of Molecular Therapeutics, New York State  
Psychiatric Institute, New York, New York, 10032, United States

## Supporting information Contents:

- I. Table S1. Microanalysis Data.....S2
- II. Table S2. Selected Reaction Monitoring (SRM) transitions.....S3
- III. Figure S2. Mass spectrum Analysis of 33.....S3
- IV. Table S3. K and t1/2 values for analogues tested.....S4

**Table S1: Microanalysis Data:**

| Compound              | C          | H    | N     | C     | H    | N     |
|-----------------------|------------|------|-------|-------|------|-------|
|                       | Calculated |      |       | Found |      |       |
| <b>14; BAK-04-51</b>  | 60.38      | 6.33 | 11.74 | 60.27 | 6.43 | 11.63 |
| <b>15; BAK-04-52</b>  | 58.11      | 6.18 | 6.78  | 58.13 | 5.99 | 6.85  |
| <b>16; BAK-04-54</b>  | 68.05      | 6.87 | 11.76 | 68.00 | 6.81 | 11.52 |
| <b>17; BAK-04-55</b>  | 64.67      | 6.98 | 10.77 | 64.68 | 6.70 | 10.85 |
| <b>18; BAK-04-56</b>  | 66.15      | 6.13 | 7.98  | 66.06 | 6.08 | 7.97  |
| <b>19; BAK-04-57</b>  | 63.66      | 5.99 | 7.68  | 63.39 | 6.02 | 7.67  |
| <b>20; CJB-038</b>    | 55.27      | 5.24 | 11.21 | 54.97 | 5.17 | 10.93 |
| <b>21; OMO6-016</b>   | 52.73      | 4.78 | 9.84  | 52.51 | 4.84 | 9.56  |
| <b>22; OMO4-013</b>   | 63.77      | 6.34 | 11.02 | 63.49 | 6.32 | 10.92 |
| <b>23; OMO3-053</b>   | 61.82      | 6.15 | 10.68 | 61.56 | 6.03 | 10.53 |
| <b>24; OMO4-015</b>   | 61.59      | 5.93 | 10.64 | 61.32 | 5.97 | 10.47 |
| <b>25; OMO3-056</b>   | 65.70      | 6.51 | 12.26 | 65.52 | 6.44 | 12.13 |
| <b>26; OMO2-088</b>   | 69.10      | 6.96 | 12.89 | 68.91 | 6.98 | 12.68 |
| <b>27; OMO3-012</b>   | 69.10      | 6.96 | 12.89 | 68.91 | 6.98 | 12.68 |
| <b>28; OMO2-086</b>   | 66.35      | 6.46 | 12.38 | 66.08 | 6.37 | 12.21 |
| <b>29; OMO2-084</b>   | 66.29      | 7.38 | 11.89 | 66.29 | 7.25 | 11.72 |
| <b>30; OMO2-063</b>   | 56.40      | 6.04 | 9.07  | 56.38 | 6.05 | 9.15  |
| <b>31; OMO2-092</b>   | 50.98      | 6.50 | 9.51  | 50.74 | 6.34 | 9.57  |
| <b>32; CAB02-015</b>  | 67.59      | 6.15 | 10.51 | 67.34 | 6.07 | 10.43 |
| <b>33; CAB02-017*</b> |            |      |       |       |      |       |
| <b>34; CAB02-029</b>  | 58.27      | 5.89 | 10.07 | 58.17 | 5.67 | 10.22 |
| <b>35; CAB02-027</b>  | 61.66      | 6.42 | 11.50 | 61.90 | 6.17 | 11.21 |
| <b>36; OMO6-018</b>   | 55.23      | 4.81 | 9.91  | 54.97 | 4.85 | 9.65  |
| <b>37; OMO6-010</b>   | 52.10      | 4.88 | 9.35  | 51.75 | 4.53 | 9.38  |

\* The Free base compound purity was determined by using the HRMS to identify  $m/z$  455.2443 (M+H)<sup>+</sup>, See Figure S2.

**Table S2: Selected Reaction Monitoring (SRM) transitions of D3R-selective ligands.**

| Compound Name | Parent Mass | Product Mass     |
|---------------|-------------|------------------|
| <b>6</b>      | 461.148     | 143.989, 213.106 |
| <b>16</b>     | 427.100     | 267.257, 144.026 |
| <b>20</b>     | 462.810     | 161.979, 233.111 |
| <b>21</b>     | 479.008     | 161.994, 231.089 |
| <b>26</b>     | 435.261     | 156.041          |
| <b>32</b>     | 439.219     | 155.980          |
| <b>33</b>     | 456.250     | 128.021, 156.025 |
| <b>34</b>     | 453.010     | 128.019, 156.027 |
| <b>36</b>     | 475.007     | 174.004, 245.110 |
| <b>37</b>     | 491.046     | 145.993, 174.012 |

**Figure S2: Mass spectrum Analysis of 33 in THA using HRMS**

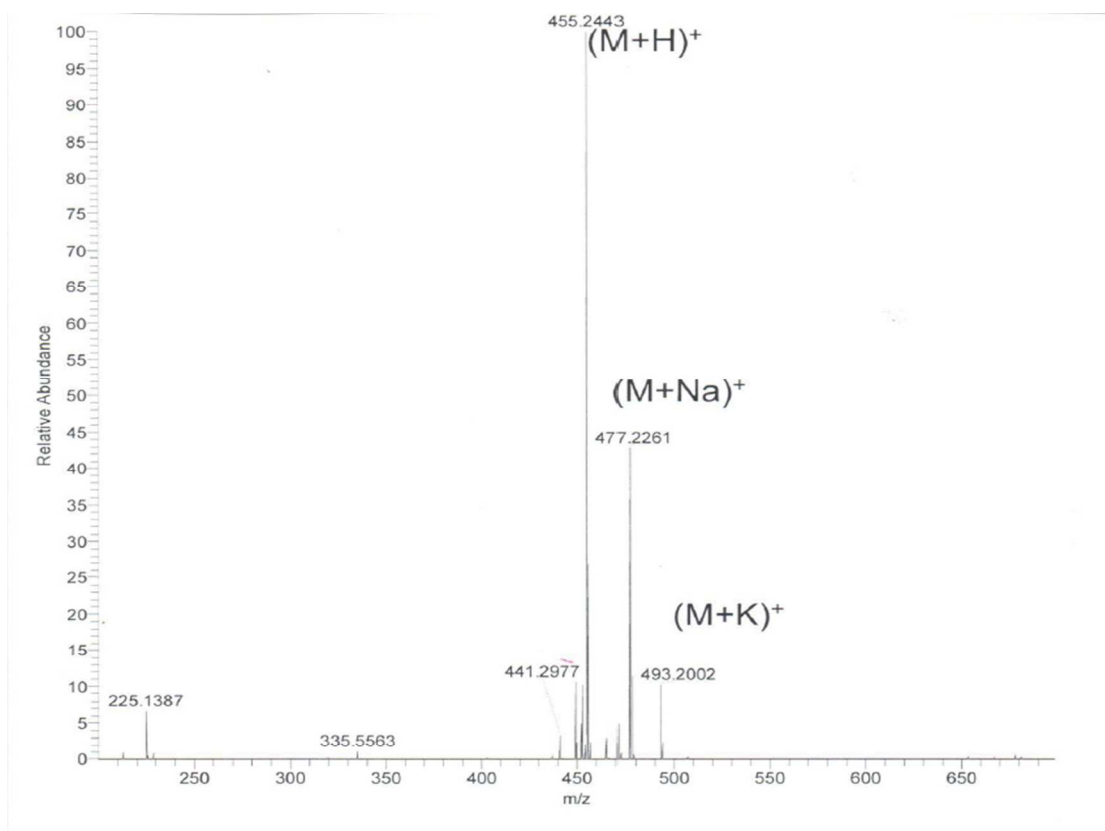

**Table S3. K and t1/2 values for analogues tested**

Unsubstituted

| Compound | k      | t1/2 (min.) |
|----------|--------|-------------|
| 32       | -0.017 | 41.8        |
| 16       | -0.010 | 67.5        |
| 34       | -0.077 | 9.0         |
| 20       | -0.032 | 21.9        |

Substituted

| Compound | k      | t1/2 (min.) |
|----------|--------|-------------|
| 26       | -0.032 | 21.9        |
| 33       | -0.029 | 24.3        |
| 21       | -0.033 | 21.2        |
| 37       | -0.058 | 11.9        |
| 36       | -0.050 | 13.9        |
| 6        | -0.037 | 18.8        |
